# Supplementary material
Source: publisher site journal article supplement (https://www.dovepress.com/article/248750)
Supplement: Supplementary file 1 [file get_supplementary_file.php]

Treatment Patterns and Healthcare Costs of Lupus Nephritis in a United States Payer Population

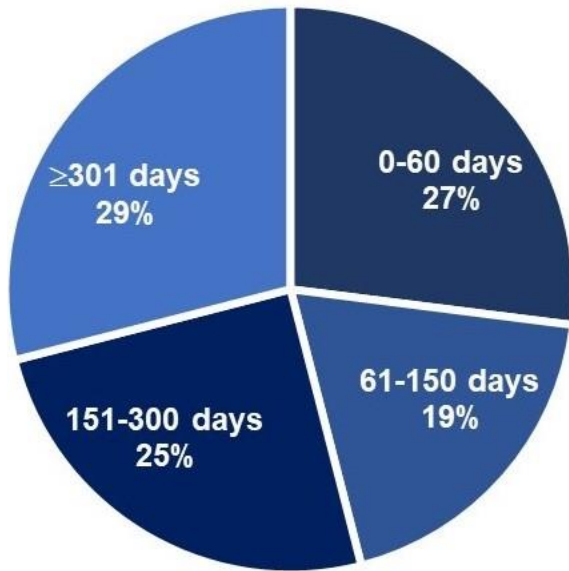

**Supplementary Figure 1** Corticosteroid exposure.

**Supplementary Table 1**

|               | <b>Code</b> | <b>Description</b>                                                                                                                                 |
|---------------|-------------|----------------------------------------------------------------------------------------------------------------------------------------------------|
| <b>ICD-9</b>  | 583.81      | Nephritis and nephropathy, not specified as acute or chronic, with other specified pathological lesion in kidney, in diseases classified elsewhere |
| <b>ICD-9</b>  | 581.81      | Nephrotic syndrome with other specified pathological lesion in kidney in diseases classified elsewhere                                             |
| <b>ICD-9</b>  | 791         | Proteinuria                                                                                                                                        |
| <b>ICD-9</b>  | 710         | Systemic lupus erythematosus                                                                                                                       |
| <b>ICD-10</b> | M32.10      | Systemic lupus erythematosus, organ or system involvement unspecified                                                                              |
| <b>ICD-10</b> | M32.9       | Systemic lupus erythematosus, unspecified                                                                                                          |
| <b>ICD-10</b> | M32.14      | Glomerular disease in systemic lupus erythematosus                                                                                                 |
| <b>ICD-10</b> | M32.15      | Tubulo-interstitial nephropathy in systemic lupus erythematosus                                                                                    |

ICD, International Classification of Diseases

**Supplementary Table 2. Proportion of members visiting key specialists during the 12-month follow-up period**

|             | Rheumatology<br>visits (%<br>members)* | Nephrology<br>visits (%<br>members)* |
|-------------|----------------------------------------|--------------------------------------|
| 0 visits    | 36%                                    | 47%                                  |
| 1-2 visits  | 19%                                    | 21%                                  |
| 3-4 visits  | 21%                                    | 15%                                  |
| 5-10 visits | 18%                                    | 10%                                  |
| 10+ visits  | 5%                                     | 7%                                   |

\*N =1,039.
